# Supplementary material
Source: Springer Nature journal article supplement (https://www.springermedizin.de/resource/supplementary/12911_2012_638_MOESM2_ESM.pdf/9526330)
Supplement: MOESM2 [file 9526330]

## Supplemental Tables

### Cost per QALY for Unadjusted Costs, Deployment Scenarios, Durations and Levels of Effectiveness (all values in US dollars)

Note: *Duration* refers to the assumed amount of time the duration has an effect on patient status; *Effectiveness* refers to the average probability of patients making a transition from one CD4-related status to the next highest group; *Rural vs nonrural* indicates whether transportation costs were included in deployment cost calculations; *Unadjusted costs* indicates that the costs were not reduced for costs that could be specifically attributed to research expenses.

| Cost Multiplier                                                                            | Low Office | High Office | Low Web | High Web |
|--------------------------------------------------------------------------------------------|------------|-------------|---------|----------|
| <b>Cost/QALY with 1 month duration @ 1% effectiveness, nonrural, and unadjusted costs</b>  |            |             |         |          |
| -0.5                                                                                       | 1,876,967  | 658,929     | 166,382 | -40,253  |
| -0.25                                                                                      | 2,790,495  | 963,438     | 318,637 | 10,449   |
| 0.0                                                                                        | 3,704,024  | 1,267,948   | 470,892 | 61,250   |
| 0.25                                                                                       | 4,617,552  | 1,572,457   | 623,146 | 112,002  |
| 0.5                                                                                        | 5,531,081  | 1,876,967   | 775,401 | 162,754  |
| <b>Cost/QALY with 3 month duration @ 1% effectiveness, nonrural, and unadjusted costs</b>  |            |             |         |          |
| -0.5                                                                                       | 201,850    | 66,512      | 56,797  | -14,501  |
| -0.25                                                                                      | 303,353    | 100,347     | 107,548 | 2,416    |
| 0.0                                                                                        | 404,856    | 134,181     | 158,300 | 19,334   |
| 0.25                                                                                       | 506,359    | 168,016     | 209,051 | 36,251   |
| 0.5                                                                                        | 607,863    | 201,850     | 259,803 | 53,168   |
| <b>Cost/QALY with 6 month duration @ 1% effectiveness, nonrural, and unadjusted costs</b>  |            |             |         |          |
| -0.5                                                                                       | 39,805     | 5,970       | 29,400  | -8063    |
| -0.25                                                                                      | 65,181     | 14,429      | 54,776  | 396      |
| 0.0                                                                                        | 90,556     | 22,888      | 80,152  | 8,854    |
| 0.25                                                                                       | 115,932    | 31,346      | 105,528 | 17,313   |
| 0.5                                                                                        | 141,308    | 39,805      | 130,903 | 25,772   |
| <b>Cost/QALY with 12 month duration @ 1% effectiveness, nonrural, and unadjusted costs</b> |            |             |         |          |
| -0.5                                                                                       | -2,708     | -11,166     | 15,702  | -4,844   |
| -0.25                                                                                      | 3,636      | -9052       | 28,390  | -614     |
| 0.0                                                                                        | 9,980      | -6,937      | 41,078  | 3,615    |
| 0.25                                                                                       | 16,324     | -4,822      | 53,766  | 7,844    |
| 0.5                                                                                        | 22,668     | -2,708      | 66,454  | 12,073   |

| Cost/QALY with 1 month duration @ 2% effectiveness, nonrural, and unadjusted costs  |              |              |              |              |
|-------------------------------------------------------------------------------------|--------------|--------------|--------------|--------------|
| Delta cost                                                                          | Office small | Office large | Online small | Online large |
| -0.5                                                                                | 1,875,074    | 657,036      | 155,960      | -50,945      |
| -0.25                                                                               | 2,788,603    | 961,546      | 607,944      | -194         |
| 0.0                                                                                 | 3,702,131    | 1,266,055    | 460,199      | 50,558       |
| .25                                                                                 | 4,615,660    | 1,570,565    | 612,454      | 101,309      |
| .5                                                                                  | 5,529,188    | 1,875,074    | 764,709      | 152,061      |
| Cost/QALY with 3 month duration @ 2% effectiveness, nonrural, and unadjusted costs  |              |              |              |              |
| -0.5                                                                                | 199,958      | 64,620       | 52,504       | -18,793      |
| -0.25                                                                               | 301,461      | 98,454       | 103,256      | -1,876       |
| 0.0                                                                                 | 402,964      | 132,289      | 154,007      | 15,041       |
| 0.25                                                                                | 504,467      | 166,123      | 204,759      | 31,958       |
| 0.5                                                                                 | 605,970      | 199,958      | 255,511      | 48,876       |
| Cost/QALY with 6 month duration @ 2% effectiveness, nonrural, and unadjusted costs  |              |              |              |              |
| -0.5                                                                                | 37,913       | 4,078        | 26,708       | -10,755      |
| -0.25                                                                               | 63,288       | 12,537       | 52,084       | -2,296       |
| 0.0                                                                                 | 88,664       | 20,995       | 77,459       | 6,162        |
| 0.25                                                                                | 114,040      | 29,454       | 102,835      | 14,621       |
| 0.5                                                                                 | 139,416      | 37,913       | 128,211      | 23,079       |
| Cost/QALY with 12 month duration @ 2% effectiveness, nonrural, and unadjusted costs |              |              |              |              |
| -0.5                                                                                | -4,600       | -13,058      | 13,810       | -6,736       |
| -0.25                                                                               | 1,744        | -10,944      | 26,498       | -2,507       |
| 0.0                                                                                 | 8,088        | -8,829       | 39,185       | 1,723        |
| 0.25                                                                                | 14,432       | -6,715       | 51,873       | 5,952        |
| 0.5                                                                                 | 20,776       | -4,600       | 64,561       | 10,181       |
| Cost/QALY with 1 month duration @ 5% effectiveness, nonrural, and unadjusted costs  |              |              |              |              |
| Delta cost                                                                          | Office small | Office large | Online small | Online large |
| -0.5                                                                                | 1,842,327    | 624,289      | -69,072      | -275,707     |
| -0.25                                                                               | 2,755,855    | 928,798      | 83,182       | -224,956     |
| 0.0                                                                                 | 3,669,384    | 1,233,308    | 235,437      | -174,204     |
| 0.25                                                                                | 4,582,912    | 1,537,817    | 387,692      | -123,452     |
| 0.5                                                                                 | 5,496,441    | 1,842,327    | 539,947      | -72,701      |

| Cost/QALY with <b>3</b> month duration @ <b>5%</b> effectiveness, nonrural, and unadjusted costs  |           |           |          |          |
|---------------------------------------------------------------------------------------------------|-----------|-----------|----------|----------|
| -0.5                                                                                              | 167,210   | 31,873    | -32,611  | -103,908 |
| -0.25                                                                                             | 268,713   | 65,707    | 18,141   | -86,991  |
| 0.0                                                                                               | 370,213   | 99,541    | 68,892   | -70,074  |
| 0.25                                                                                              | 471,720   | 133,376   | 119,644  | -53,157  |
| 0.5                                                                                               | 573,223   | 167,210   | 170,395  | -36,239  |
| Cost/QALY with <b>6</b> month duration @ <b>5%</b> effectiveness, nonrural, and unadjusted costs  |           |           |          |          |
| -0.5                                                                                              | 5,165     | -28,669   | -23,496  | -60,958  |
| -0.25                                                                                             | 30,541    | -20,211   | 1,880    | -52,500  |
| 0.0                                                                                               | 55,917    | -11,752   | 27,256   | -44,041  |
| 0.25                                                                                              | 81,292    | -3,294    | 52,632   | -35,583  |
| 0.50                                                                                              | 106,668   | 5,165     | 78,008   | -27,124  |
| Cost/QALY with <b>12</b> month duration @ <b>5%</b> effectiveness, nonrural, and unadjusted costs |           |           |          |          |
| -0.5                                                                                              | -37,347   | -45,806   | -18,938  | -39,484  |
| -0.25                                                                                             | 31,003    | -43,691   | -6,250   | -35,254  |
| 0.0                                                                                               | -24,659   | -41,577   | 6,438    | -31,025  |
| 0.25                                                                                              | -18,316   | -39,462   | 19,126   | -26,796  |
| 0.50                                                                                              | -11,972   | -37,347   | 31,814   | -22,566  |
| Cost/QALY with <b>1</b> month duration @ <b>9%</b> effectiveness, nonrural, and unadjusted costs  |           |           |          |          |
| -0.5                                                                                              | 1,793,772 | 575,734   | -471,505 | -678,139 |
| -0.25                                                                                             | 2,707,301 | 880,244   | -319,250 | -627,388 |
| 0.0                                                                                               | 3,620,829 | 1,184,753 | -166,995 | -576,636 |
| 0.25                                                                                              | 4,534,358 | 1,489,263 | -14,740  | -525,885 |
| 0.5                                                                                               | 5,447,886 | 1,793,772 | 137,514  | -475,133 |
| Cost/QALY with <b>3</b> month duration @ <b>9%</b> effectiveness, nonrural, and unadjusted costs  |           |           |          |          |
| -0.5                                                                                              | 118,656   | -16,682   | -177,678 | -248,975 |
| -0.25                                                                                             | 220,159   | 17,152    | -126,926 | -232,058 |
| 0.0                                                                                               | 321,662   | 50,987    | -76,174  | -215,141 |
| 0.25                                                                                              | 423,165   | 84,821    | -25,423  | -198,223 |
| 0.5                                                                                               | 524,668   | 118,656   | 25,329   | -181,306 |
| Cost/QALY with <b>6</b> month duration @ <b>9%</b> effectiveness, nonrural, and unadjusted costs  |           |           |          |          |
| -0.5                                                                                              | -43,390   | -77,224   | -104,221 | -141,684 |

|                                                                                                    |           |           |         |          |
|----------------------------------------------------------------------------------------------------|-----------|-----------|---------|----------|
| -0.25                                                                                              | -18,014   | -68,765   | -78,845 | -133,225 |
| 0.00                                                                                               | 7,362     | -60,307   | -53,469 | -124,767 |
| 0.25                                                                                               | 32,738    | -51,848   | -28,093 | -116,308 |
| 0.50                                                                                               | 58,114    | -43,390   | -2,718  | -107,849 |
| <b>Cost/QALY with 12 month duration @ 9% effectiveness, nonrural, and unadjusted costs</b>         |           |           |         |          |
| -0.5                                                                                               | -85,902   | -94,361   | -67,492 | -88,038  |
| -0.25                                                                                              | -79,558   | -92,246   | -54,805 | -83,809  |
| 0.00                                                                                               | -73,214   | -90,131   | -42,117 | -79,580  |
| 0.25                                                                                               | -66,870   | -88,017   | -29,429 | -75,350  |
| 0.50                                                                                               | -60,526   | -85,902   | -16,741 | -71,121  |
| <b>Cost/QALY with 1 month duration @ 5% effectiveness, with rural transport, unadjusted costs</b>  |           |           |         |          |
| -0.5                                                                                               | 1,866,863 | 648,825   | N/A     | N/A      |
| -0.25                                                                                              | 2,780,392 | 953,335   | N/A     | N/A      |
| 0.00                                                                                               | 3,693,920 | 1,257,844 | N/A     | N/A      |
| 0.25                                                                                               | 4,607,449 | 1,562,354 | N/A     | N/A      |
| 0.50                                                                                               | 5,520,977 | 1,866,863 | N/A     | N/A      |
| <b>Cost/QALY with 3 month duration @ 5% effectiveness, with rural transport, unadjusted costs</b>  |           |           |         |          |
| -0.50                                                                                              | 175,389   | 40,051    | N/A     | N/A      |
| -0.25                                                                                              | 276,892   | 73,886    | N/A     | N/A      |
| 0.00                                                                                               | 378,395   | 107,720   | N/A     | N/A      |
| 0.25                                                                                               | 479,898   | 141,555   | N/A     | N/A      |
| 0.50                                                                                               | 581,402   | 175,389   | N/A     | N/A      |
| <b>Cost/QALY with 6 month duration @ 5% effectiveness, with rural transport, unadjusted costs</b>  |           |           |         |          |
| -0.50                                                                                              | 9,254     | -24,580   | N/A     | N/A      |
| -0.25                                                                                              | 34,630    | -16,121   | N/A     | N/A      |
| 0.00                                                                                               | 60,006    | -7,663    | N/A     | N/A      |
| 0.25                                                                                               | 85,382    | 796       | N/A     | N/A      |
| 0.50                                                                                               | 110,758   | 9,254     | N/A     | N/A      |
| <b>Cost/QALY with 12 month duration @ 5% effectiveness, with rural transport, unadjusted costs</b> |           |           |         |          |
| -0.50                                                                                              | -35,303   | -43,761   | N/A     | N/A      |
| -0.25                                                                                              | -28,959   | -41,647   | N/A     | N/A      |
| 0.00                                                                                               | -22,615   | -39,532   | N/A     | N/A      |
| 0.25                                                                                               | -16,271   | -37,417   | N/A     | N/A      |

0.50

-9,927

-35,303

N/A

N/A

---
